# Supplementary material for: Electrospun carbon nanofibers embedded with MOF-derived N-doped porous carbon and ZnO quantum dots for asymmetric flexible supercapacitors
Source: Royal Society of Chemistry journal article supplement (doi:10.1039/d1nj01369f), 2021-01-01
Supplement: d1nj01369f1.pdf [file d1nj01369f1.pdf]

# Electrospun carbon nanofibers embedded with MOF-derived N-doped porous carbon and ZnO quantum dots for asymmetric flexible supercapacitors

Zhen Li <sup>a, \*</sup>, Jingting Bu <sup>a</sup>, Chenying Zhang <sup>a</sup>, Lingli Cheng <sup>a, \*</sup>, Dengyu Pan <sup>b</sup>, Zhiwen Chen <sup>a</sup> and Minghong Wu <sup>b, \*</sup>

<sup>a</sup> Shanghai Applied Radiation Institute, Shanghai University, Shanghai, 200444, PR China

<sup>b</sup> School of Environmental and Chemical Engineering, Shanghai University, Shanghai, 201800, PR China

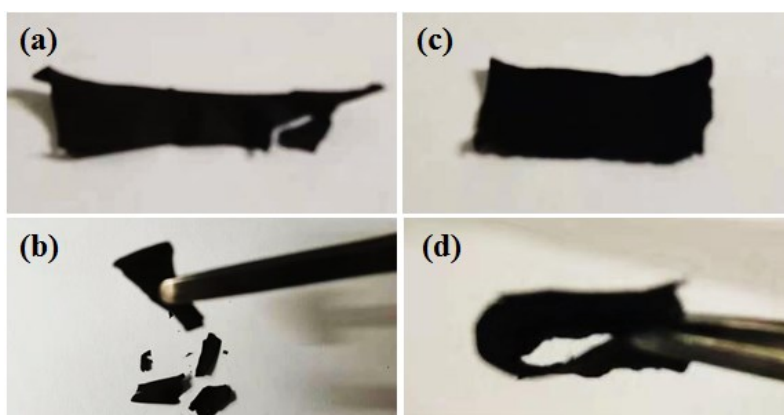

**Fig. S1.** (a, b) Photographs of CNF membrane before and after bending. (c, d) Photographs of ZnO QD/NPC/CNF membrane before and after bending.

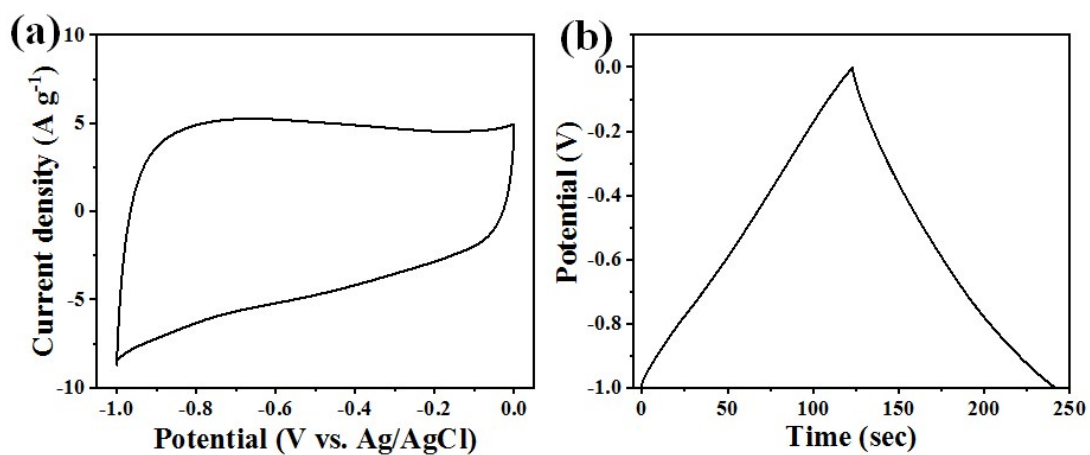

**Fig. S2.** Electrochemical performance of CNFs (a) CV curve at  $20 \text{ mV s}^{-1}$ . (b) GCD curve at  $1 \text{ A g}^{-1}$ .

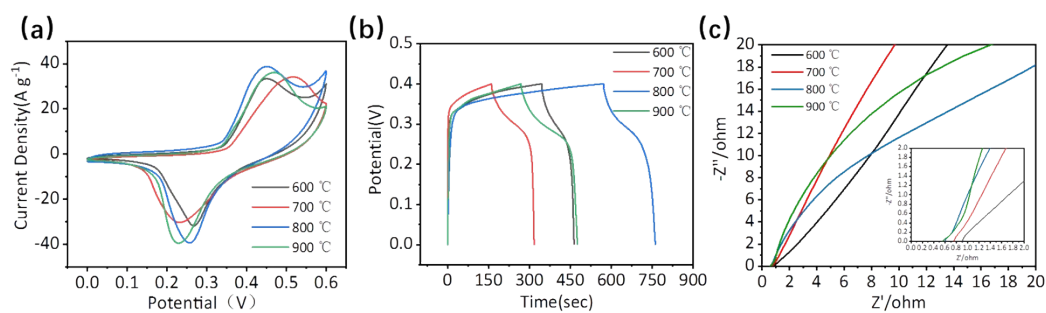

**Fig. S3.** The evaluated optimum temperature condition of ZnO QD/NPC/CNF.

**Table. S1.** Pore characteristics of the CNFs, ZnO QD/NPC/CNF and NPC/CNF.

| Sample         | $S_{\text{BET}}$<br>( $\text{m}^2 \text{ g}^{-1}$ ) | $V_{\text{Total}}$<br>( $\text{cm}^3 \text{ g}^{-1}$ ) | $V_{\text{Micro}}$<br>( $\text{cm}^3 \text{ g}^{-1}$ ) | Pore<br>size(nm) |
|----------------|-----------------------------------------------------|--------------------------------------------------------|--------------------------------------------------------|------------------|
| CNFs           | 32.1                                                | 0.17                                                   | 0.007                                                  | 5.2              |
| ZnO QD/NPC/CNF | 111.3                                               | 0.48                                                   | 0.02                                                   | 4.7              |
| NPC/CNF        | 586.5                                               | 0.64                                                   | 0.17                                                   | 4.4              |

**Table. S2.** The maximum energy density and power density of previously reported asymmetric supercapacitors.

| Supercapacitors                                           | Energy density<br>(W h kg <sup>-1</sup> ) | Power density<br>(kW kg <sup>-1</sup> ) |
|-----------------------------------------------------------|-------------------------------------------|-----------------------------------------|
| This work                                                 | 33.8                                      | 16                                      |
| ZnO QD/carbon/CNTs//porous N-doped carbon/CNTs [1]        | 23.6                                      | 16.9                                    |
| CNO-ZnO//ZnO [2]                                          | 10                                        | 8.1                                     |
| ZnO NC//AC [3]                                            | 25.2                                      | 2                                       |
| rGO/Co <sub>3</sub> O <sub>4</sub> /ZnO//rGO [4]          | 12.4                                      | 8.5                                     |
| CC/ZnO@C@NiO<br>CSNAs//commercial grapheme [5]            | 35.7                                      | 2.7                                     |
| Mo:ZnO@NF//AC@NF [6]                                      | 39                                        | 7.4                                     |
| ZnO/ $\alpha$ -Fe <sub>2</sub> O <sub>3</sub> //ZnO/C [7] | 41.2                                      | 7                                       |

[1] Y. Zhang, B. Lin, J. Wang, J. Tian, Y. Sun, X. Zhang, H. Yang, All-solid-state asymmetric supercapacitors based on ZnO quantum dots/carbon/CNT and porous N-doped carbon/CNT electrodes derived from a single ZIF-8/CNT template, *Journal of Materials Chemistry A* 4 (2016) 10282-10293.

[2] D. Mohapatra, S. Parida, S. Badravyana, B.K. Singh, High performance flexible asymmetric CNO-ZnO//ZnO supercapacitor with an operating voltage of 1.8 V in aqueous medium, *Applied Materials Today* 7 (2017) 212-221.

- [3] X. He, J.E. Yoo, M.H. Lee, J. Bae, Morphology engineering of ZnO nanostructures for high performance supercapacitors: enhanced electrochemistry of ZnO nanocones compared to ZnO nanowires, *Nanotechnology* 28 (2017) 245402.
- [4] S. Borhani, M. Moradi, M.A. Kiani, S. Hajati, J. Toth,  $\text{Co}_x\text{Zn}_{1-x}$  ZIF-derived binary  $\text{Co}_3\text{O}_4/\text{ZnO}$  wrapped by 3D reduced graphene oxide for asymmetric supercapacitor: Comparison of pure and heat-treated bimetallic MOF, *Ceramics International* 43 (2017) 14413-14425.
- [5] Y. Ouyang, X. Xia, H. Ye, L. Wang, X. Jiao, W. Lei, Q. Hao, Three-Dimensional Hierarchical Structure  $\text{ZnO}@C@NiO$  on Carbon Cloth for Asymmetric Supercapacitor with Enhanced Cycle Stability, *ACS Applied Materials & Interfaces* 10 (2018) 3549-3561.
- [6] A. Ali, M. Ammar, M. Ali, Z. Yahya, M.Y. Javaid, S.u. Hassan, T. Ahmed, Mo-doped ZnO nanoflakes on Ni-foam for asymmetric supercapacitor applications, *RSC Advances* 9 (2019) 27432-27438.
- [7] D. Sarkar, S. Das, S. G. B. Pal, H. Rensmo, A. Shukla, D.D. Sarma, A Cost-Effective and High-Performance Core-Shell-Nanorod-Based  $\text{ZnO}/\alpha\text{-Fe}_2\text{O}_3//\text{ZnO}/\text{C}$  Asymmetric Supercapacitor, *Journal of The Electrochemical Society* 164 (2017) A987-A994.
